# Supplementary material
Source: publisher site journal article supplement (https://neobiota.pensoft.net/article/21470/download/suppl/36/)
Supplement: Supplementary file 1

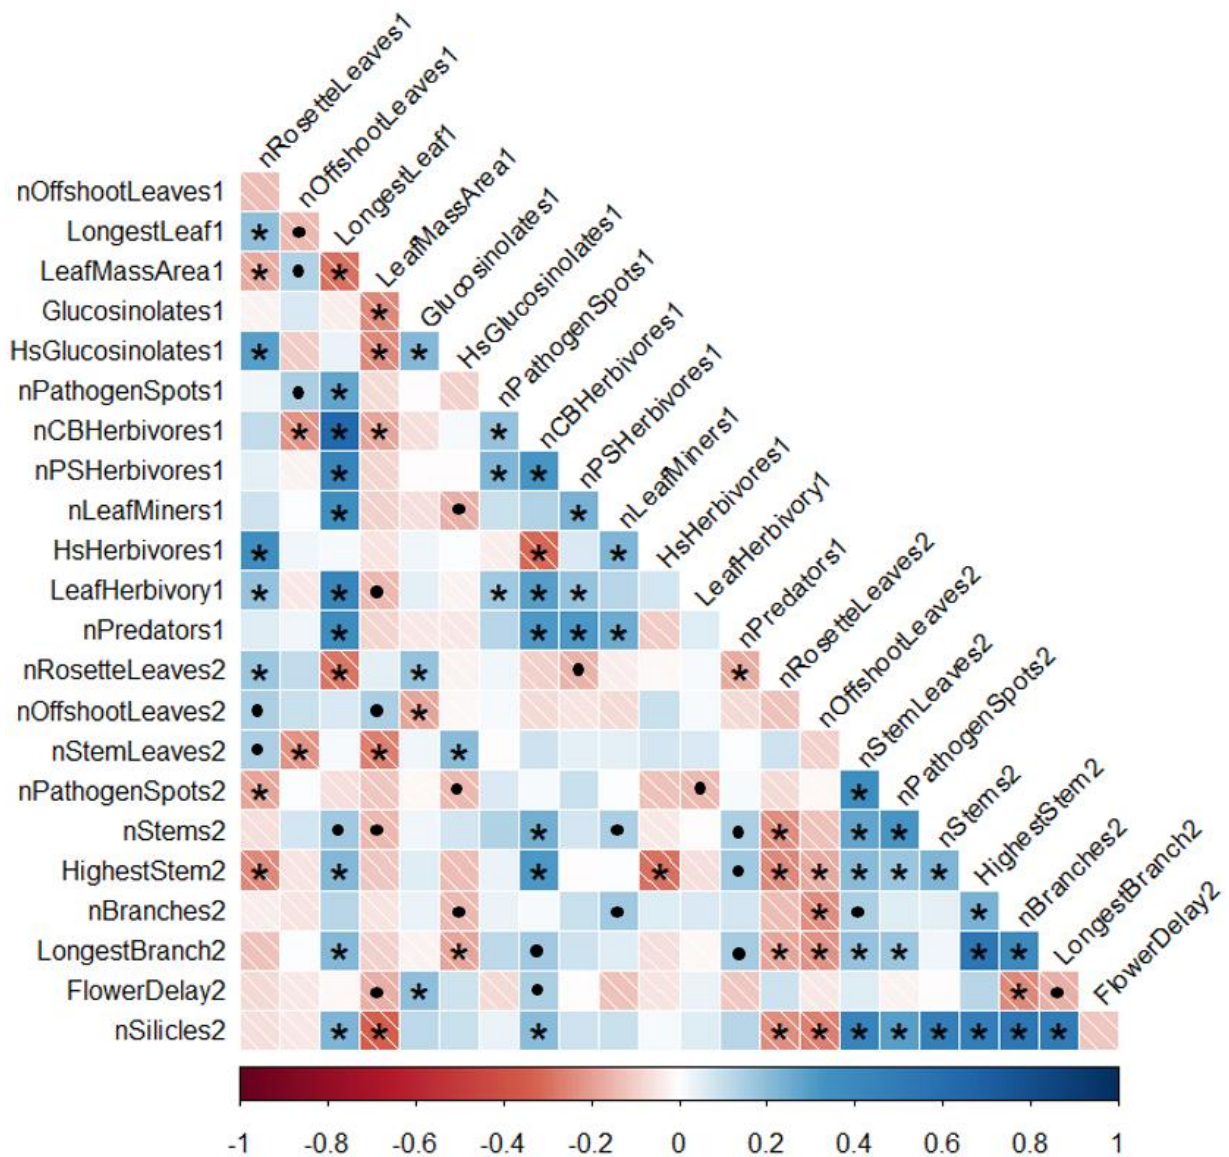

**Figure S5.** Pairwise correlations between individual traits of *Bunias orientalis* plants. Traits comprised measures of growth, defence, antagonist load, and reproduction of plants from 12 populations, grown in a field common garden over two years. Heatmap shadings are based on Spearman's rank-correlation coefficient  $\rho$  ( $n = 131\text{--}144$  individuals in pairwise comparisons). Correlations are marked as positive (blue) or negative (red, hatched fields). Asterisks denote significant correlations with  $P < 0.05$ , dots denote tendencies with  $P < 0.1$ . LeafMassArea: leaf mass per area; Hs: diversity of (Shannon index); 1, 2: year the trait was obtained.
